# Supplementary material for: Associations between Blood Pressure Indices and Brachial–ankle Pulse Wave Velocity in Treated Hypertensive Adults: results from the China Stroke Primary Prevention Trial (CSPPT)
Source: PubMed Central journal article supplement (PMC6547652; doi:10.1038/s41598-019-44740-z), 2019-06-03
Supplement: 41598_2019_44740_MOESM1_ESM.pdf [file 41598_2019_44740_MOESM1_ESM.pdf]

**Associations between Blood Pressure Indices and Brachial–ankle Pulse Wave Velocity in Treated Hypertensive Adults: results from the China Stroke Primary Prevention Trial (CSPPT)**

Lihua Hu<sup>1</sup>, M.D., Yuanyuan Zhang<sup>2</sup>, M.D., Xiao Huang<sup>1</sup>, M.D., Ph.D., Yun Song<sup>2</sup>, M.D., Xianhui Qin<sup>2,3</sup>, M.D., Binyan Wang<sup>2,3</sup>, M.D., Ph.D., Yan Zhang<sup>4</sup>, M.D., Genfu Tang<sup>5</sup>, M.D., Jianping Li<sup>4</sup>, M.D., Ping Li<sup>1</sup>, M.D., Ph.D., Huihui Bao<sup>1\*</sup>, M.D., Ph.D., Yong Huo<sup>4</sup>, M.D., Xiaoshu Cheng<sup>1\*</sup>, M.D., Ph.D.

<sup>1</sup>Department of Cardiovascular Medicine, the Second Affiliated Hospital of Nanchang University, Nanchang of Jiangxi, China.

<sup>2</sup>National Clinical Research Study Center for Kidney Disease; State Key Laboratory for Organ Failure Research; Renal Division, Nanfang Hospital, Southern Medical University, Guangzhou, China.

<sup>3</sup>Institute of Biomedicine, Anhui Medical University, Hefei, China.

<sup>4</sup>Department of Cardiology and Heart Center, Peking University First Hospital, Beijing, China.

<sup>5</sup>School of Health Administration, Anhui University, Hefei, China.

**\* Correspondence and reprint requests should be addressed to:**

Huihui Bao, M.D., Ph.D.

Department of Cardiovascular Medicine, the Second Affiliated Hospital of Nanchang University, Nanchang of Jiangxi, China.

Email: [huihui\\_bao77@126.com](mailto:huihui_bao77@126.com)

Phone: +8613870092915

Fax: 0086-0791-86262262

or

Xiaoshu Cheng, M.D., Ph.D.

Department of Cardiovascular Medicine, the Second Affiliated Hospital of Nanchang University, Nanchang of Jiangxi, China.

Email: [xiaoshumenfan126@163.com](mailto:xiaoshumenfan126@163.com)

Phone: +8613607089128

Fax: 0086-0791-86262262

**Supplementary figure 1. Subgroup analyses of the effect of PP on baPWV.**

| Subgroup                          | Total | Mean $\pm$ SD  | Adjusted* $\beta$ (95% CI) | P for interaction |
|-----------------------------------|-------|----------------|----------------------------|-------------------|
| <b>Sex</b>                        |       |                |                            | <b>0.096</b>      |
| male                              | 5864  | 17.2 $\pm$ 3.3 | 0.085 (0.080, 0.091)       |                   |
| female                            | 8734  | 17.3 $\pm$ 3.4 | 0.073 (0.069, 0.077)       |                   |
| <b>Age, y</b>                     |       |                |                            | <b>0.389</b>      |
| <60                               | 4334  | 15.6 $\pm$ 2.6 | 0.085 (0.080, 0.091)       |                   |
| $\geq$ 60                         | 10261 | 18.0 $\pm$ 3.5 | 0.087 (0.083, 0.091)       |                   |
| <b>BMI, kg/m<sup>2</sup></b>      |       |                |                            | <b>0.58</b>       |
| <24                               | 6139  | 17.6 $\pm$ 3.5 | 0.078 (0.073, 0.083)       |                   |
| $\geq$ 24                         | 8444  | 17.0 $\pm$ 3.3 | 0.077 (0.073, 0.081)       |                   |
| <b>MTHFR C677T</b>                |       |                |                            | <b>0.086</b>      |
| CC                                | 3963  | 17.4 $\pm$ 3.4 | 0.084 (0.078, 0.091)       |                   |
| CT                                | 7144  | 17.2 $\pm$ 3.4 | 0.074 (0.070, 0.079)       |                   |
| TT                                | 3491  | 17.2 $\pm$ 3.5 | 0.077 (0.070, 0.083)       |                   |
| <b>FPG, mmol/L</b>                |       |                |                            | <b>0.047</b>      |
| <6.1                              | 9432  | 17.0 $\pm$ 3.3 | 0.075 (0.071, 0.079)       |                   |
| $\geq$ 6.1                        | 4910  | 17.7 $\pm$ 3.5 | 0.082 (0.076, 0.088)       |                   |
| <b>TC, mmol/L</b>                 |       |                |                            | <b>0.118</b>      |
| <5.2                              | 7176  | 17.1 $\pm$ 3.3 | 0.080 (0.075, 0.084)       |                   |
| $\geq$ 5.2                        | 7165  | 17.5 $\pm$ 3.5 | 0.075 (0.071, 0.080)       |                   |
| <b>Hcy, <math>\mu</math>mol/L</b> |       |                |                            | <b>0.576</b>      |
| <10                               | 3254  | 16.6 $\pm$ 3.2 | 0.074 (0.068, 0.081)       |                   |
| $\geq$ 10                         | 11183 | 17.5 $\pm$ 3.4 | 0.078 (0.074, 0.082)       |                   |
| <b>RHR, beats/min</b>             |       |                |                            | <b>&lt;0.001</b>  |
| <80                               | 8737  | 16.7 $\pm$ 3.1 | 0.068 (0.064, 0.072)       |                   |
| $\geq$ 80                         | 5548  | 18.1 $\pm$ 3.7 | 0.086 (0.080, 0.092)       |                   |
| <b>Treatment group</b>            |       |                |                            | <b>0.016</b>      |
| Enalapril                         | 7322  | 17.3 $\pm$ 3.4 | 0.073 (0.068, 0.077)       |                   |
| Enalapril-folic acid              | 7276  | 17.3 $\pm$ 3.4 | 0.082 (0.078, 0.087)       |                   |

Abbreviations: baPWV, brachial–ankle pulse wave velocity; PP, pulse pressure; BMI, body mass index; *MTHFR*, methylenetetrahydrofolate reductase; FPG, fasting plasma glucose; TC, total cholesterol; Hcy, homocysteine; RHR, resting heart rate.

\*adjusted for age, sex, center, *MTHFR* C677T polymorphisms, treatment group, antihypertensive treatment, BMI, smoking status, and alcohol consumption, RHR, TC, HDL-C, TG, FPG, creatinine, hcy, uric acid, if not be stratified.

**Supplementary figure 2. Subgroup analyses of the effect of MAP on baPWV.**

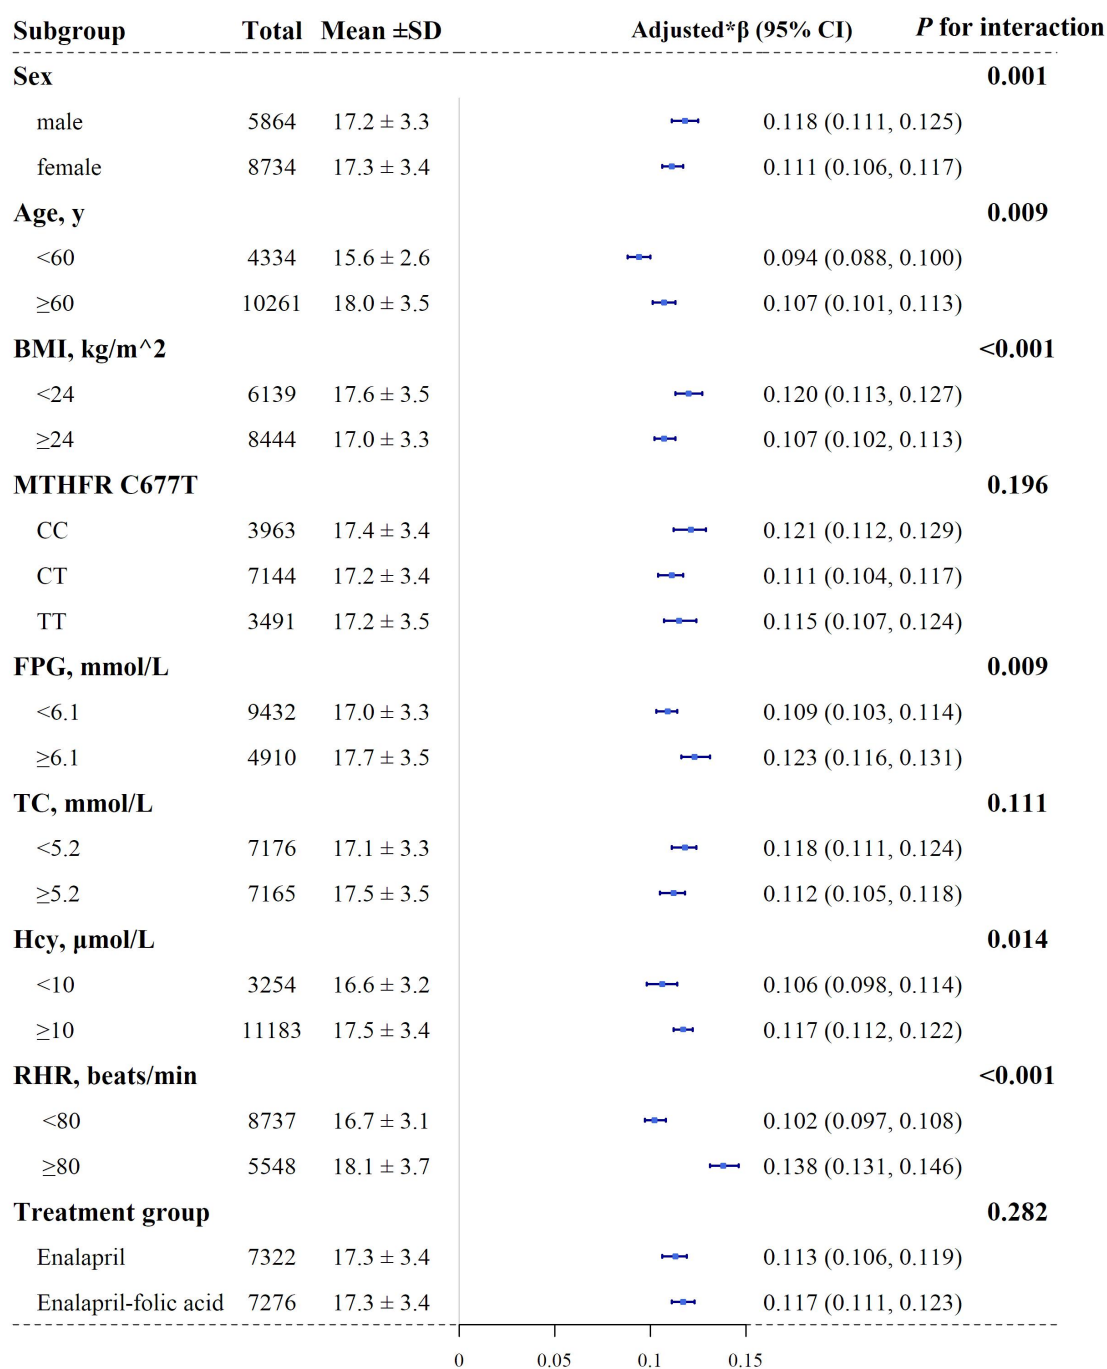

Abbreviations: baPWV, brachial–ankle pulse wave velocity; MAP, mean arterial pressure; BMI, body mass index; *MTHFR*, methylenetetrahydrofolate reductase; FPG, fasting plasma glucose; TC, total cholesterol; Hcy, homocysteine; RHR, resting heart rate.

\*adjusted for age, sex, center, *MTHFR* C677T polymorphisms, treatment group, antihypertensive

*treatment, BMI, smoking status, and alcohol consumption, RHR, TC, HDL-C, TG, FPG, creatinine, hcy, uric acid, if not be stratified.*
